# Supplementary material for: Dielectric behavior of self-assembled monolayers on conducting metal oxides
Source: Royal Society of Chemistry journal article supplement (doi:10.1039/c1jm15061h), 2011-11-22
Supplement: c1jm15061h.pdf [file c1jm15061h.pdf]

## Supporting Information

# Dielectric Behavior of Self-Assembled Monolayers on Conducting Metal Oxides

Okta Yildirim,<sup>a,b</sup> Michiel G. Maas,<sup>a</sup> Peter J. de Veen,<sup>a</sup> Minh D. Nguyen,<sup>a</sup> David N. Reinhoudt,<sup>b</sup> Dave H. A. Blank,<sup>a</sup> Guus Rijnders,<sup>a\*</sup> and Jurriaan Huskens<sup>b\*</sup>

*MESA+ Institute for Nanotechnology, University of Twente, P.O. Box 217, 7500 AE, Enschede, The Netherlands.*

<sup>a</sup>*Inorganic Materials Science, Fax: +31 53 4893595; Tel: +31 53 4892618; E-mail: a.j.h.m.rijnders@utwente.nl*

<sup>b</sup>*Molecular Nanofabrication Group, Fax: +31 53 4894645; Tel: +31 53 4892995; E-mail: j.huskens@utwente.nl*

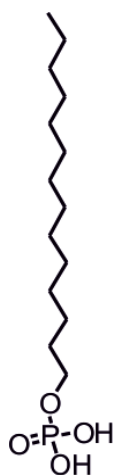

**Figure S1.** Chemical structure of tetradecylphosphoric acid (TDP).

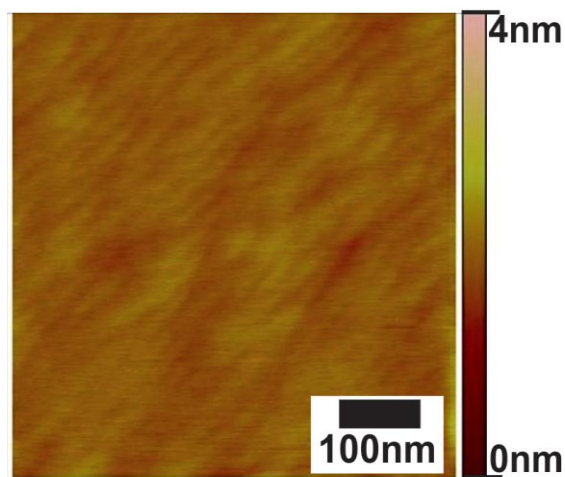

**Figure S2.** Contact mode AFM height image of a blank Nb-STO surface.

More detailed characterization of TDP SAMs on NbSTO has been reported before.<sup>[1]</sup>

Figure S3 shows the elemental spectra after electrodeposition of Cu on the region of a Pt-patterned TDP SAM-covered Nb-STO sample as shown in Figures 2c,d and 3b. According to the XPS result, atomic concentrations of the elements in the region are: 68.5 % C, 26% O, 1.5% Cu and 4% Pt.

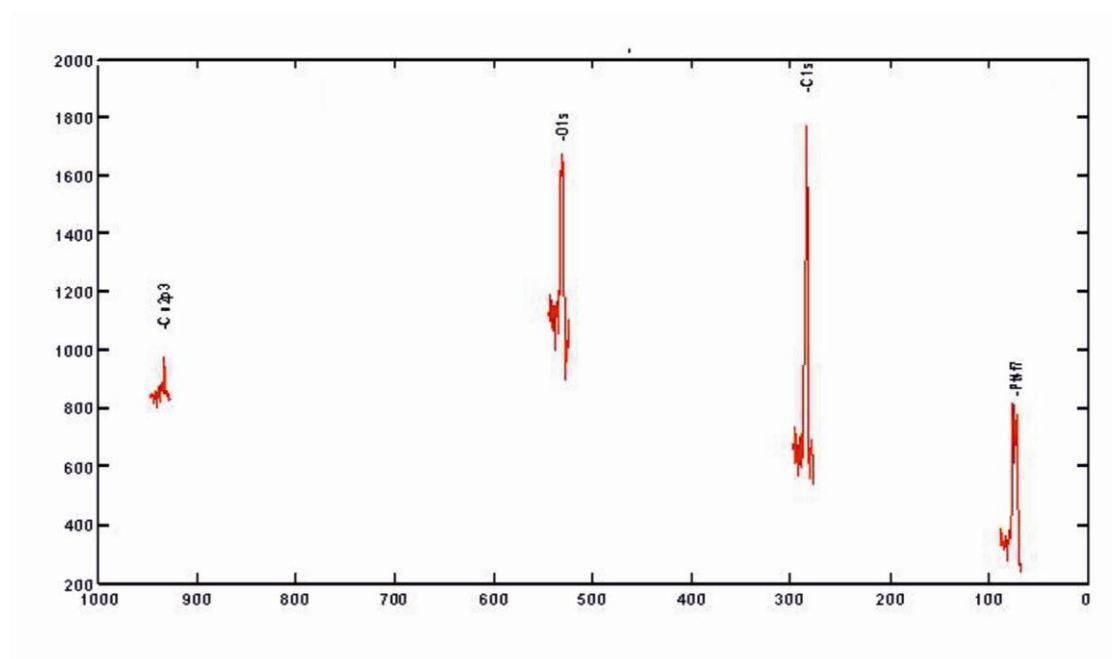

**Figure S3.** Elemental spectra of the area where electrodeposited Cu was seen on the Pt patterns deposited by PLD on TDP-covered Nb-STO.

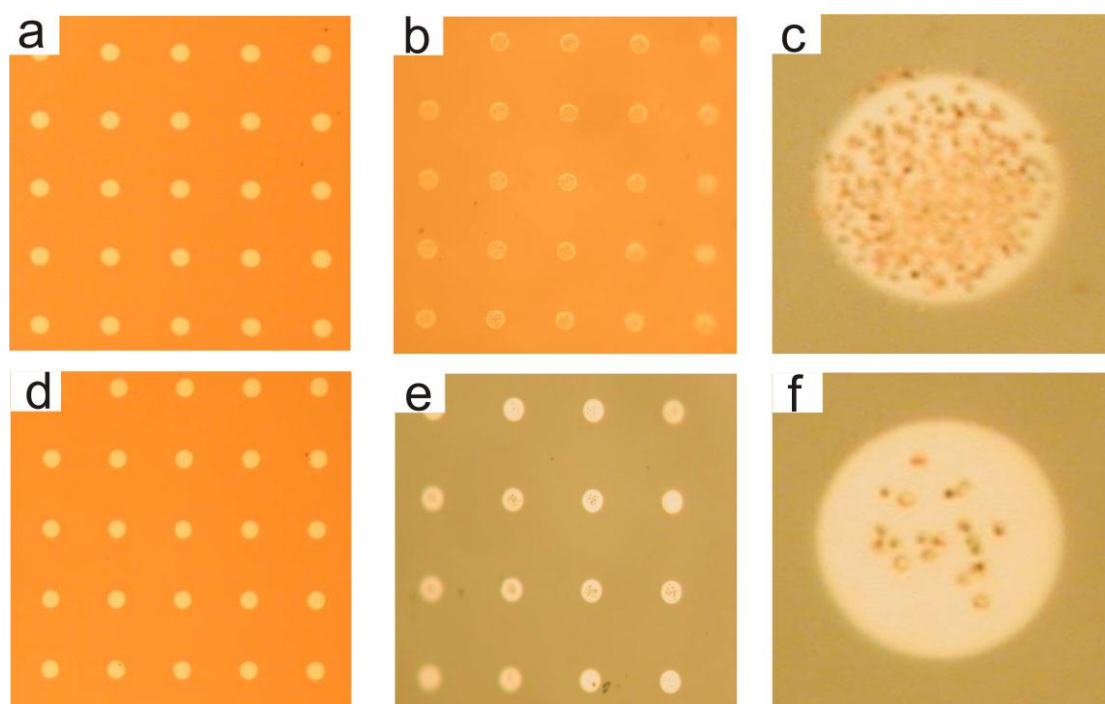

**Figure S4.** Optical images of Pt top contacts of (a) bare Nb-STO after stencil deposition by PLD with conditions for harsh landing. (b, c) Same sample after electrochemical Cu deposition, with the zoom-in to a region where Cu growth was seen (c). Optical images of Pt (d) top contacts of TDP SAM-modified Nb-STO after stencil deposition by PLD with conditions for harsh landing. (e,f) Same sample after electrochemical Cu deposition, with the zoom-in to a region where Cu growth was seen (f).

## References

1. O. Yildirim, M. D. Yilmaz, D. N. Reinhoudt, D. H. A. Blank, G. Rijnders, J. Huskens, *Langmuir* **2011**, *27*, 9890-9894.
